# Supplementary material
Source: PubMed Central journal article supplement (PMC6100751)
Supplement: NIHMS1503398-supplement-supplement_1.pdf [file NIHMS1503398-supplement-supplement_1.pdf]

**Table S1.** Descriptive statistics for PM<sub>2.5</sub> exposure in NC from 2002-2009

| <b>Exposure Metric</b> |                | <b>Mean (SD)</b> | <b>25%</b> | <b>Median</b> | <b>75%</b> | <b>Max</b> | <b>IQR</b> |
|------------------------|----------------|------------------|------------|---------------|------------|------------|------------|
| Monitor                | 2002           | 13.1 (6.7)       | 8.4        | 11.7          | 16.7       | 62.7       | 8.3        |
|                        | 2003           | 12.8 (6.7)       | 7.9        | 11.7          | 16.6       | 50.0       | 8.7        |
|                        | 2004           | 13.3 (6.8)       | 8.2        | 12.3          | 17.1       | 43.9       | 8.9        |
|                        | 2005           | 13.6 (7.2)       | 8.2        | 12.3          | 17.7       | 69.5       | 9.5        |
|                        | 2006           | 13.1 (6.8)       | 8.1        | 11.8          | 17.0       | 84.1       | 8.9        |
|                        | 2007           | 12.9 (6.8)       | 7.6        | 11.5          | 16.9       | 61.0       | 9.3        |
|                        | 2008           | 11.7 (6.0)       | 7.5        | 10.7          | 14.9       | 107.6      | 7.4        |
|                        | 2009           | 9.4 (4.3)        | 6.3        | 8.8           | 11.9       | 38.1       | 5.6        |
|                        | CMAQ-PHASE     | 2002             | 12.6 (6.3) | 8.1           | 11.4       | 15.6       | 76.4       |
| 2003                   |                | 13.1 (6.2)       | 8.7        | 12.0          | 13.1       | 56.3       | 4.5        |
| 2004                   |                | 12.6 (6.0)       | 8.1        | 11.6          | 15.9       | 67.5       | 7.8        |
| 2005                   |                | 13.6 (7.7)       | 8.5        | 12.2          | 17.3       | 62.1       | 8.8        |
| 2006                   |                | 13.0 (6.3)       | 8.3        | 11.8          | 16.5       | 63.0       | 8.2        |
| 2007                   |                | 12.6 (6.6)       | 7.6        | 11.1          | 16.2       | 53.4       | 8.6        |
| 2008                   |                | 11.5 (7.2)       | 6.5        | 9.5           | 14.7       | 56.1       | 8.1        |
| 2009                   |                | 9.5 (4.0)        | 6.6        | 8.9           | 11.8       | 28.3       | 5.2        |
| CMAQ-DF                |                | 2002             | 11.9 (5.5) | 7.9           | 11.0       | 14.7       | 56.6       |
|                        | 2003           | 11.2 (5.3)       | 7.4        | 10.4          | 14.2       | 54.5       | 6.8        |
|                        | 2004           | 11.8 (5.3)       | 7.8        | 11.1          | 15.0       | 208.7      | 7.3        |
|                        | 2005           | 12.1 (5.8)       | 7.7        | 11.2          | 15.4       | 115.9      | 7.7        |
|                        | 2006           | 11.7 (5.4)       | 7.7        | 10.9          | 14.9       | 60.8       | 7.3        |
|                        | 2007           | 11.5 (5.4)       | 7.3        | 10.5          | 14.8       | 50.6       | 7.6        |
|                        | 2008           | 10.2 (4.9)       | 6.6        | 9.5           | 13.0       | 95.6       | 6.4        |
|                        | 2009           | 8.8 (4.1)        | 5.9        | 8.2           | 10.9       | 49.0       | 5.0        |
|                        | Satellite 10km | 2002             | 12.5 (6.1) | 8.3           | 11.5       | 15.2       | 106.4      |
| 2003                   |                | 12.0 (5.5)       | 8.0        | 11.4          | 15.0       | 51.9       | 7.0        |
| 2004                   |                | 13.0 (5.6)       | 8.8        | 12.5          | 16.4       | 45.9       | 7.5        |
| 2005                   |                | 12.9 (6.0)       | 8.4        | 11.9          | 16.1       | 52.2       | 7.8        |
| 2006                   |                | 12.4 (5.8)       | 8.0        | 11.7          | 15.8       | 43.0       | 7.8        |
| 2007                   |                | 12.4 (6.0)       | 7.6        | 11.3          | 15.6       | 44.8       | 8.1        |
| 2008                   |                | 11.1 (5.2)       | 7.3        | 10.4          | 13.9       | 50.9       | 6.6        |
| 2009                   |                | 9.0 (3.7)        | 6.2        | 8.6           | 11.4       | 27.3       | 5.2        |
| Satellite 1km          |                | 2002             | 11.9 (6.3) | 7.7           | 10.5       | 14.6       | 65.6       |
|                        | 2003           | 11.4 (5.7)       | 7.4        | 10.4          | 14.4       | 58.4       | 7.1        |
|                        | 2004           | 12.1 (5.8)       | 7.6        | 11.3          | 15.5       | 53.0       | 7.9        |
|                        | 2005           | 13.0 (6.9)       | 7.9        | 11.6          | 16.6       | 66.2       | 8.7        |
|                        | 2006           | 12.0 (6.1)       | 7.6        | 10.8          | 15.4       | 67.7       | 7.9        |
|                        | 2007           | 11.9 (6.3)       | 6.9        | 10.6          | 15.9       | 55.3       | 8.9        |
|                        | 2008           | 10.5 (5.6)       | 6.4        | 9.4           | 13.5       | 94.2       | 7.1        |
|                        | 2009           | 8.1 (3.7)        | 5.3        | 7.5           | 10.3       | 41.7       | 5.0        |

Abbreviations: CMAQ, Community Multi-scale Air Quality; DF, data fusion; EPA, Environmental Protection Agency.

**Table S2.** Annual average PM<sub>2.5</sub> (ug/m<sup>3</sup>) levels for CATHGEN participants, stratified by urban/rural status.

|                                  | <b>Urban</b> |      | <b>Rural</b> |      |
|----------------------------------|--------------|------|--------------|------|
|                                  | Mean (SD)    | IQR  | Mean (SD)    | IQR  |
| PM <sub>2.5</sub> Monitor        | 12.93 (1.26) | 1.27 | 12.64 (1.16) | 1.18 |
| PM <sub>2.5</sub> CMAQ-PHASE     | 13.07 (1.30) | 0.97 | 12.58 (1.21) | 0.92 |
| PM <sub>2.5</sub> CMAQ-DF        | 12.78 (1.07) | 0.94 | 12.38 (0.96) | 0.86 |
| PM <sub>2.5</sub> Satellite 10km | 12.50 (0.97) | 0.85 | 12.29 (0.83) | 0.64 |
| PM <sub>2.5</sub> Satellite 1km  | 12.61 (1.10) | 1.22 | 12.10 (1.05) | 1.12 |

Abbreviations: CMAQ, Community Multi-scale Air Quality; DF, data fusion; EPA, Environmental Protection Agency; IQR, interquartile range; SD, standard deviation.

**Table S3.** Individual mean, interquartile range, and maximum differences between annual average levels for each exposure model

|                                | Mean of<br>difference (SD) | IQR of<br>difference | Max of<br>difference |
|--------------------------------|----------------------------|----------------------|----------------------|
| <b>PM<sub>2.5</sub></b>        |                            |                      |                      |
| Monitor – CMAQ-PHASE           | 0.70 (0.61)                | 0.68                 | 5.89                 |
| Monitor – CMAQ-DF              | 0.68 (0.54)                | 0.65                 | 4.45                 |
| Monitor – Satellite 10km       | 0.82 (0.68)                | 0.77                 | 5.14                 |
| Monitor – Satellite 1km        | 0.72 (0.60)                | 0.75                 | 5.63                 |
| CMAQ-PHASE – DF-CMAQ           | 0.45 (0.47)                | 0.42                 | 5.27                 |
| CMAQ-PHASE – Satellite 10km    | 0.79 (0.69)                | 0.71                 | 6.78                 |
| CMAQ-PHASE – Satellite 1km     | 0.81 (0.70)                | 0.85                 | 6.13                 |
| DF-CMAQ – Satellite 10km       | 0.48 (0.48)                | 0.43                 | 3.98                 |
| DF-CMAQ – Satellite 1km        | 0.62 (0.55)                | 0.69                 | 4.73                 |
| Satellite 10km – Satellite 1km | 0.59 (0.46)                | 0.60                 | 3.30                 |

Abbreviations: CMAQ, Community Multi-scale Air Quality; DF, data fusion; EPA, Environmental Protection Agency; IQR, interquartile range; SD, standard deviation.

**Table S4.** Associations between 1- $\mu\text{g}/\text{m}^3$  increases in  $\text{PM}_{2.5}$  and CAD, stratified by urban/ rural status.

| Air pollution Metric |       | Odds ratio | 95% CI     | Interaction p-value   |
|----------------------|-------|------------|------------|-----------------------|
| Monitor              |       |            |            |                       |
|                      | Urban | 1.11       | 1.03, 1.20 |                       |
|                      | Rural | 0.99       | 0.92, 1.06 | <b><i>p</i>=0.02</b>  |
| CMAQ-PHASE           |       |            |            |                       |
|                      | Urban | 1.13       | 1.06, 1.22 |                       |
|                      | Rural | 1.03       | 0.97, 1.10 | <b><i>p</i> =0.05</b> |
| CMAQ-DF              |       |            |            |                       |
|                      | Urban | 1.13       | 1.03, 1.23 |                       |
|                      | Rural | 1.08       | 0.99, 1.17 | <i>p</i> =0.49        |
| Satellite 10km       |       |            |            |                       |
|                      | Urban | 1.12       | 1.02, 1.24 |                       |
|                      | Rural | 1.14       | 1.04, 1.25 | <i>p</i> =0.87        |
| Satellite 1km        |       |            |            |                       |
|                      | Urban | 1.12       | 1.03, 1.22 |                       |
|                      | Rural | 1.07       | 1.00, 1.15 | <i>p</i> =0.39        |

Abbreviations: CMAQ, Community Multi-scale Air Quality; DF, data fusion; EPA, Environmental Protection Agency.

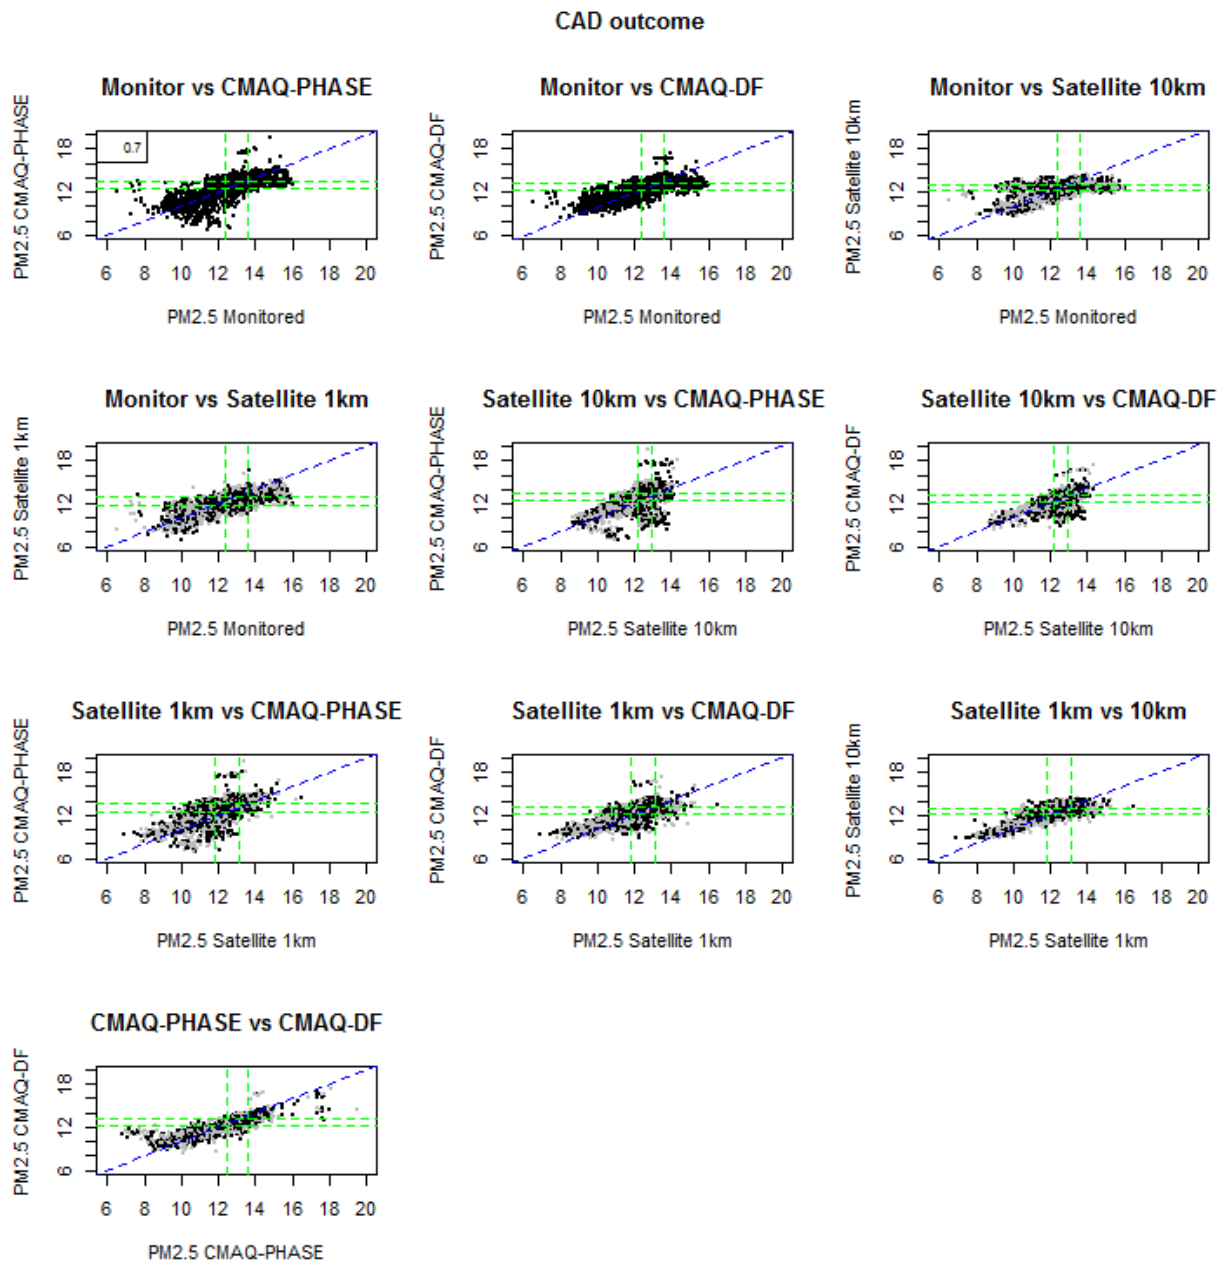

**Figure S1. Plots of annual average PM<sub>2.5</sub> levels, by CAD outcome status.** Black dots represent those participants with a CAD index score >23, while grey dots represent those with a CAD index score <23. The X and Y-axes represent the PM<sub>2.5</sub> averages for the corresponding exposure metric. The blue dashed line represents the Y=X line and the green dashed lines indicate the 25<sup>th</sup> and 75<sup>th</sup> percentile for each exposure metric. Inconsistent observations between the two exposure assignment methods are located in the upper left and lower right quadrants.

### MI outcome

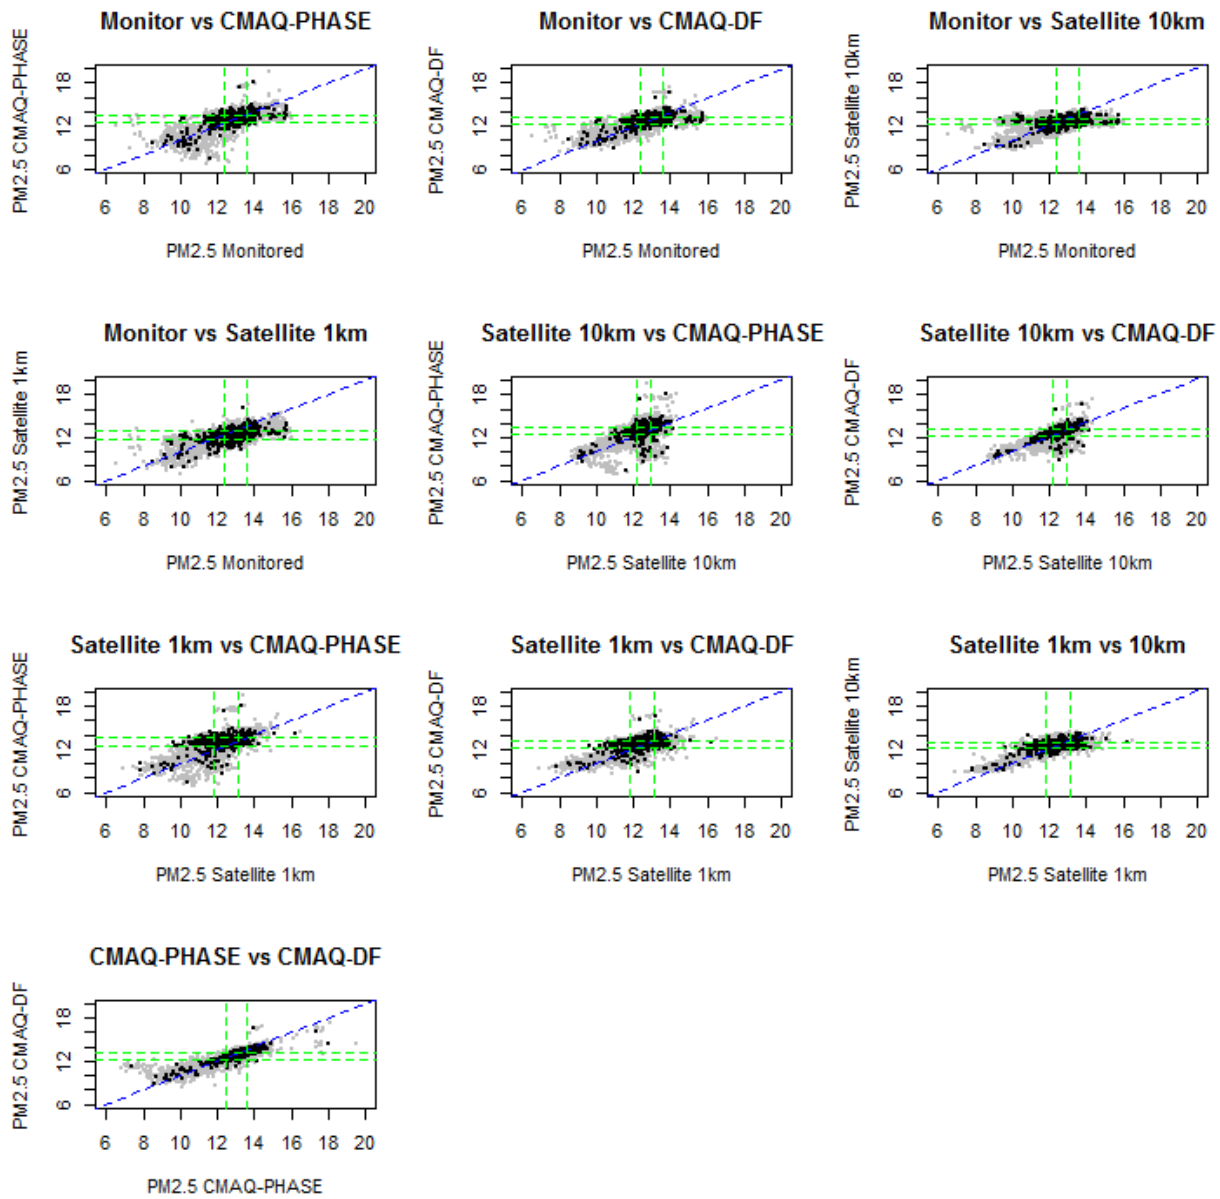

**Figure S2. Plots of annual average PM<sub>2.5</sub> levels, by MI outcome status.** Black dots represent those participants with a recent MI. The X and Y-axes represent the PM<sub>2.5</sub> averages for the corresponding exposure metric. The blue dashed line represents the Y=X line and the green dashed lines indicate the 25<sup>th</sup> and 75<sup>th</sup> percentile for each exposure metric. Inconsistent observations between the two exposure assignment methods are located in the upper left and lower right quadrants.
